# Supplementary material for: Design of Inhibitors That Target the Menin–Mixed-Lineage Leukemia Interaction
Source: MDPI journal article supplement (doi:10.3390/computation12010003), 2023-12-27
Supplement: s1 [file s1]

Archive with 1 entries (1 files):
- computation-2509839-supplementary.pdf
